# Supplementary material
Source: Springer Nature journal article supplement (https://www.springermedizin.de/resource/supplementary/12885_2011_2863_MOESM5_ESM.pdf/9461938)
Supplement: MOESM5 [file 9461938]

|       |             |             |            |            |            |            |            |             |      |
|-------|-------------|-------------|------------|------------|------------|------------|------------|-------------|------|
| DR3v2 | NM_003790.2 | CGGGCCCTGC  | GGGCGCGGGG | CTGAAGGCGG | AACCACGACG | GGCAGAGAGC | ACGGAGCCCG | GAAGCCCCTG  | 70   |
|       | DR3v2Δ6     | -----       | -----      | -----      | -----      | -----GAGC  | ACGGAGCCCG | GAAGCCCCTG  | 24   |
| DR3v2 | NM_003790.2 | GGCGCCCGTC  | GGAGGGCTAT | GGAGCAGCGG | CCGCGGGGCT | GCGCGGCGGT | GGCGGCGCGG | CTCTCTCTGG  | 140  |
|       | DR3v2Δ6     | GGCGCCCGTC  | GGAGGGCTAT | GGAGCAGCGG | CCGCGGGGCT | GCGCGGCGGT | GGCGGCGCGG | CTCTCTCTGG  | 94   |
| DR3v2 | NM_003790.2 | TGCTGCTGGG  | GGCCCCGGCC | CAGGGCGGCA | CTCGTAGCCC | CAGGTGTGAC | TGTGCCGGTG | ACTTCCACAA  | 210  |
|       | DR3v2Δ6     | TGCTGCTGGG  | GGCCCCGGCC | CAGGGCGGCA | CTCGTAGCCC | CAGGTGTGAC | TGTGCCGGTG | ACTTCCACAA  | 164  |
| DR3v2 | NM_003790.2 | GAAGATTGGT  | CTGTTTTGTT | GCAGAGGCTG | CCCAGCGGGG | CACTACCTGA | AGGCCCTTTG | CACGGAGCCC  | 280  |
|       | DR3v2Δ6     | GAAGATTGGT  | CTGTTTTGTT | GCAGAGGCTG | CCCAGCGGGG | CACTACCTGA | AGGCCCTTTG | CACGGAGCCC  | 234  |
| DR3v2 | NM_003790.2 | TGCGGCAACT  | CCACCTGCCT | TGTGTGTCCC | CAAGACACCT | TCTTGGCCTG | GGAGAACCAC | CATAAATTCTG | 350  |
|       | DR3v2Δ6     | TGCGGCAACT  | CCACCTGCCT | TGTGTGTCCC | CAAGACACCT | TCTTGGCCTG | GGAGAACCAC | CATAAATTCTG | 304  |
| DR3v2 | NM_003790.2 | AATGTGCCCC  | CTGCCAGGCC | TGTGATGAGC | AGGCCTCCCA | GGTGGCGCTG | GAGAACTGTT | CAGCAGTGCC  | 420  |
|       | DR3v2Δ6     | AATGTGCCCC  | CTGCCAGGCC | TGTGATGAGC | AGGCCTCCCA | GGTGGCGCTG | GAGAACTGTT | CAGCAGTGCC  | 374  |
| DR3v2 | NM_003790.2 | CGACACCCGC  | TGTGGCTGTA | AGCCAGGCTG | GTTTGTGGAG | TGCCAGGTCA | GCCAAATGTT | CAGCAGTTCA  | 490  |
|       | DR3v2Δ6     | CGACACCCGC  | TGTGGCTGTA | AGCCAGGCTG | GTTTGTGGAG | TGCCAGGTCA | GCCAAATGTT | CAGCAGTTCA  | 444  |
| DR3v2 | NM_003790.2 | CCCTTCTACT  | GCCAACCATG | CCTAGACTGC | GGGGCCCTGC | ACCGCCACAC | ACGGCTACTC | TGTTCCCGCA  | 560  |
|       | DR3v2Δ6     | CCCTTCTACT  | GCCAACCATG | CCTAGACTGC | GGGGCCCTGC | ACCGCCACAC | ACGGCTACTC | TGTTCCCGCA  | 514  |
| DR3v2 | NM_003790.2 | GAGATACTGA  | CTGTGGGACC | TGCCTGCCTG | GCTTCTATGA | ACATGGCGAT | GGCTGCGTGT | CCTGCCCCAC  | 630  |
|       | DR3v2Δ6     | GAGATACTGA  | CTGTGGGACC | TGCCTGCCTG | GCTTCTATGA | ACATGGCGAT | GGCTGCGTGT | CCTGCCCCAC  | 584  |
| DR3v2 | NM_003790.2 | GAGCACCCCTG | GGGAGCTGTC | CAGAGCGCTG | TGCCGCTGTC | TGTGGCTGGA | GGCAGATGTT | CTGGGTCCAG  | 700  |
|       | DR3v2Δ6     | -----       | -----      | -----      | -----      | -----      | -----TGTT  | CTGGGTCCAG  | 598  |
| DR3v2 | NM_003790.2 | GTGCTCCTGG  | CTGGCCTTGT | GGTCCCCCTC | CTGCTTGGGG | CCACCTGAC  | CTACACATAC | CGCCACTGCT  | 770  |
|       | DR3v2Δ6     | GTGCTCCTGG  | CTGGCCTTGT | GGTCCCCCTC | CTGCTTGGGG | CCACCTGAC  | CTACACATAC | CGCCACTGCT  | 668  |
| DR3v2 | NM_003790.2 | GGCCTCACAA  | GCCCCTGGTT | ACTGCAGATG | AAGCTGGGAT | GGAGGCTCTG | ACCCACCCAC | CGGCCACCCA  | 840  |
|       | DR3v2Δ6     | GGCCTCACAA  | GCCCCTGGTT | ACTGCAGATG | AAGCTGGGAT | GGAGGCTCTG | ACCCACCCAC | CGGCCACCCA  | 738  |
| DR3v2 | NM_003790.2 | TCTGTACACC  | TTGGACAGCG | CCCACACCCT | TCTAGCACCT | CCTGACAGCA | GTGAGAAGAT | CTGCACCCTC  | 910  |
|       | DR3v2Δ6     | TCTGTACACC  | TTGGACAGCG | CCCACACCCT | TCTAGCACCC | CCTGACAGCA | GTGAGAAGAT | CTGCACCCTC  | 808  |
| DR3v2 | NM_003790.2 | CAGTTGGTGG  | GTAACAGCTG | GACCCCTGGC | TACCCCGAGA | CCCAGGAGGC | GCTCTGCCCG | CAGGTGACAT  | 980  |
|       | DR3v2Δ6     | CAGTTGGTGG  | GTAACAGCTG | GACCCCTGGC | TACCCCGAGA | CCCAGGAGGC | GCTCTGCCCG | CAGGTGACAT  | 878  |
| DR3v2 | NM_003790.2 | GGTCCTGGGA  | CCAGTTGCCC | AGCAGAGCTC | TTGGCCCCGC | TGCTGCGCCC | ACACTCTCGC | CAGAGTCCCC  | 1050 |
|       | DR3v2Δ6     | GGTCCTGGGA  | CCAGTTGCCC | AGCAGAGCTC | TTGGCCCCGC | TGCTGCGCCC | ACACTCTCGC | CAGAGTCCCC  | 948  |
| DR3v2 | NM_003790.2 | AGCCGGCTCG  | CCAGCCATGA | TGCTGCAGCC | GGGCCCGCAG | CTCTACGACG | TGATGGACGC | GGTCCCAGCG  | 1120 |
|       | DR3v2Δ6     | AGCCGGCTCG  | CCAGCCATGA | TGCTGCAGCC | GGGCCCGCAG | CTCTACGACG | TGATGGACGC | GGTCCCAGCG  | 1018 |
| DR3v2 | NM_003790.2 | CGGCGCTGGA  | AGGAGTTCGT | GCGCACGCTG | GGGCTGCGCG | AGGCAGAGAT | CGAAGCCGTG | GAGGTGGAGA  | 1190 |
|       | DR3v2Δ6     | CGGCGCTGGA  | AGGAGTTCGT | GCGCACGCTG | GGGCTGCGCG | AGGCAGAGAT | CGAAGCCGTG | GAGGTGGAGA  | 1088 |
| DR3v2 | NM_003790.2 | TCGGCCGCTT  | CCGAGACCAG | CAGTACGAGA | TGCTCAAGCG | CTGGCCGACG | CAGCAGCCCG | CGGGCCTCGG  | 1260 |
|       | DR3v2Δ6     | TCGGCCGCTT  | CCGAGACCAG | CAGTACGAGA | TGCTCAAGCG | CTGGCCGACG | CAGCAGCCCG | CGGGCCTCGG  | 1158 |
| DR3v2 | NM_003790.2 | AGCCGTTTAC  | GCGGCCCTGG | AGCGCATGGG | GCTGGACGGC | TGCGTGAAG  | ACTTGGCCAG | CCGCCTGCAG  | 1330 |
|       | DR3v2Δ6     | AGCCGTTTAC  | GCGGCCCTGG | AGCGCATGGG | GCTGGACGGC | TGCGTGAAG  | ACTTGGCCAG | CCGCCTGCAG  | 1228 |
| DR3v2 | NM_003790.2 | CGCGGCCGT   | GACACGGCGC | CCACTTGCCA | CCTAGGCGCT | CTGGTGGCCC | TTGCAAGAAG | CCTAAGTACG  | 1400 |
|       | DR3v2Δ6     | CGCGGCCGT   | GACACGGCGC | CCACTTGCCA | CCTAGGCGCT | CTGGTGGCCC | TTGCAAGAAG | CCTAAGTACG  | 1298 |
| DR3v2 | NM_003790.2 | GTTACTTATG  | CGTGTAGACA | TTTTATGTCA | CTTATTAAGC | CGCTGGCAGG | GCCCTGCGTA | GCAGCACCAG  | 1470 |
|       | DR3v2Δ6     | GTTACTTATG  | CGTGTAGACA | TTTTATGTCA | CTTATTAAGC | CGCTGGCAGG | GCCCTGCGTA | GCAGCACCAG  | 1368 |
| DR3v2 | NM_003790.2 | CCGGCCCCAC  | CCCTGCTCGC | CCCTATCGCT | CCAGCCAAGG | CGAAGAAGCA | CGAACGAATG | TCGAGAGGGG  | 1540 |
|       | DR3v2Δ6     | CCGGCTCCAC  | CCCTGCTCGC | CCCTATCGCT | CCAGCCAAGG | CGAAGAAGCA | CGAAC----- | -----       | 1423 |
| DR3v2 | NM_003790.2 | GTGAAGACAT  | TTCTCAACTT | CTCGCCGGA  | GTTTGGCTGA | GATCGCGGTA | TAAATCTGT  | GAAAGAAAAC  | 1610 |
|       | DR3v2Δ6     | -----       | -----      | -----      | -----      | -----      | -----      | -----       | 1423 |
| DR3v2 | NM_003790.2 | AAAAAAAAC   | AAAAAAAAAA | AAAAAAAAAA | 1638       |            |            |             |      |
|       | DR3v2Δ6     | -----       | -----      | -----      | 1423       |            |            |             |      |
